# Supplementary material
Source: Springer Nature journal article supplement (https://www.springermedizin.de/resource/supplementary/12888_2012_1135_MOESM2_ESM.pdf/9479100)
Supplement: MOESM2 [file 9479100]

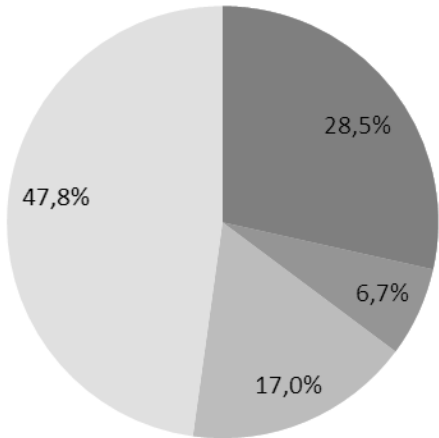

■ Adequate pharmacotherapy only

■ Adequate psychotherapy only

■ Adequate pharmacotherapy and adequate psychotherapy

■ No adequate treatment
